# Supplementary material
Source: HighWire-hosted journal article supplement (https://jnm.snmjournals.org/highwire/filestream/93924/field_highwire_adjunct_files/3/45385_Supplemental_Figure_1_legend.pdf)
Supplement: 45385_Supplemental_Figure_1_legend.pdf [file 45385_Supplemental_Figure_1_legend.pdf]

**SUPPLEMENTAL FIGURE 1.** Heterogeneity of cortical CMRglc abnormalities in MCI. (A) Severe bilateral parieto-temporal and PCC hypometabolism. (B) Severe bilateral PCC hypometabolism. (C) Severe right parieto-temporal and moderate bilateral PCC hypometabolism. (D) Severe right frontal hypometabolism. 3D-SSP maps and corresponding Z scores showing CMRglc reductions in clinical groups as compared with the NL database displayed on a color-coded scale ranging from 0 (black) to 6 (red). From left to right: 3D-SSP maps are shown on the right and left lateral, anterior and posterior, right and left middle views of a standardized brain image.
